# Supplementary material for: Microbiome disturbance and resilience dynamics of the upper respiratory tract during influenza A virus infection
Source: PubMed Central journal article supplement (PMC7242466; doi:10.1038/s41467-020-16429-9), 2020-05-21
Supplement: 41467_2020_16429_MOESM1_ESM.pdf [file 41467_2020_16429_MOESM1_ESM.pdf]

1 **Supplemental information for**

2 **Microbiome disturbance and resilience dynamics of**  
3 **the upper respiratory tract during influenza A virus**  
4 **infection**

5

6 Drishti Kaul<sup>1,8</sup>, Raveen Rathnasinghe<sup>2,8</sup>, Marcela Ferres<sup>2</sup>, Gene S. Tan<sup>1,3</sup>, Aldo Barrera<sup>2,4</sup>, Brett  
7 E. Pickett<sup>5</sup>, Barbara A. Methe<sup>5</sup>, Suman Das<sup>5</sup>, Isolda Budnik<sup>2</sup>, Rebecca Halpin<sup>5</sup>, David  
8 Wentworth<sup>5b</sup>, Mirco Schmolke<sup>6c</sup>, Ignacio Mena<sup>6</sup>, Randy A. Albrecht<sup>6</sup>, Indresh Singh<sup>5</sup>, Karen E.  
9 Nelson<sup>5</sup>, Adolfo Garcia-Sastre<sup>6,7</sup>, Chris L. Dupont<sup>1\*</sup>, Rafael A. Medina<sup>2,4,6\*</sup>.

10

11 <sup>1</sup>J. Craig Venter Institute, 4120 Capricorn Lane, La Jolla, CA 92037, USA.

12 <sup>2</sup>Departamento de Enfermedades Infecciosas e Inmunología Pediátrica, Facultad de Medicina,  
13 Pontificia Universidad Católica de Chile, Santiago, Chile.

14 <sup>3</sup> Department of Infectious Diseases, University of California San Diego, La Jolla, CA 92037,  
15 USA

16 <sup>4</sup>Millennium Institute on Immunology and Immunotherapy, Santiago, Chile

17 <sup>5</sup>J. Craig Venter Institute, 9704 Medical Center Drive, Rockville, Maryland 20850, 14 USA.

18 <sup>6</sup>Department of Microbiology, Global Health and Emerging Pathogens Institute, Icahn School of  
19 Medicine at Mount Sinai, New York, NY 10029, USA.

20 <sup>7</sup>Department of Medicine, Icahn School of Medicine at Mount Sinai, New York, NY 10029,  
21 USA.

22 <sup>8</sup>These authors contributed equally to this work

23 <sup>b</sup> Present address: National Center for Immunization and Respiratory Diseases, Centers for  
24 Disease Control and Prevention, Atlanta, GA, USA.

25 <sup>c</sup> Present address: Department of Microbiology and Molecular Medicine, University of Geneva,

26 Switzerland

27 \*Corresponding author: E-mail: [rmedinai@uc.cl](mailto:rmedinai@uc.cl), [cdupont@jcvl.org](mailto:cdupont@jcvl.org)

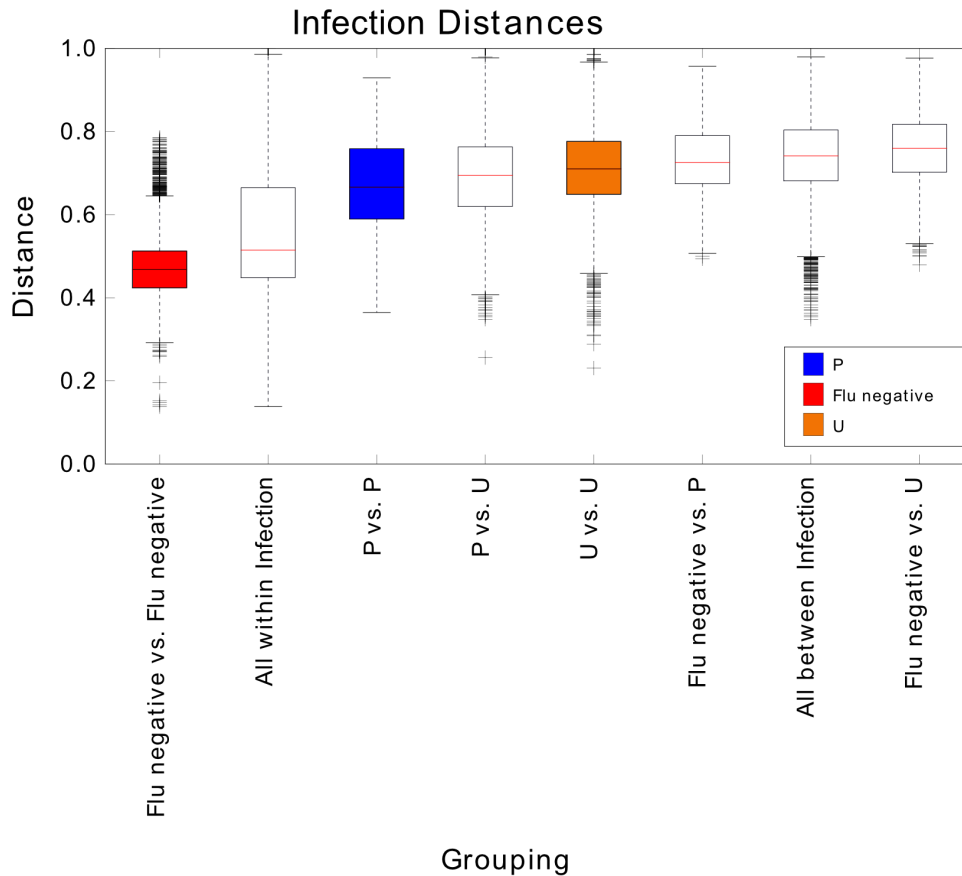

28

29 **Supplementary Figure 1. Diversity distance analyses of the microbiome of infected and**  
 30 **uninfected humans.** Box and whisker plots for beta diversity distances within and between  
 31 influenza types for the human samples (P: Influenza positive, U: Influenza unknown, Flu  
 32 negative). The boxplots represent the diversity between the different infection types. All the  
 33 distances were calculated using the Bray-Curtis metric. The box represents the interquartile  
 34 range, the red line in the box indicates median for each of the sample groupings and the error  
 35 bars represent standard deviation. Dotted whiskers outside the box extend from the highest to the  
 36 lowest observation represented in the plot. Source data are provided as a Source Data file.

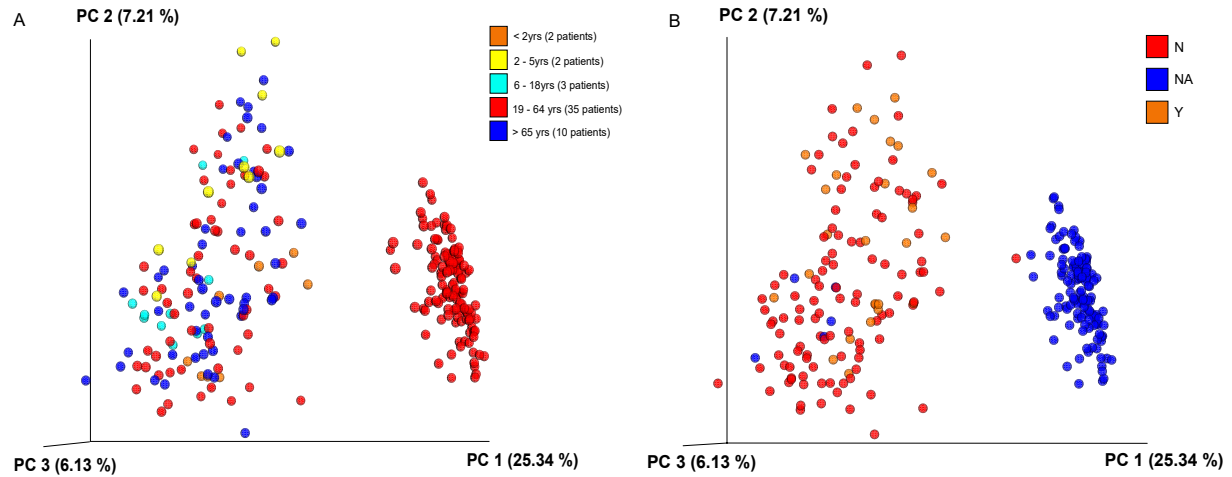

37

38 **Supplementary Figure 2: Microbiome stratification for human patients according to two**  
 39 **clinical factors.** Clustering of data points for all human patients shown according to A) different  
 40 age groupings and B) Vaccination status (NA: Not available/ applicable; Y: Yes; N: No). Source  
 41 data are provided as a Source Data file.

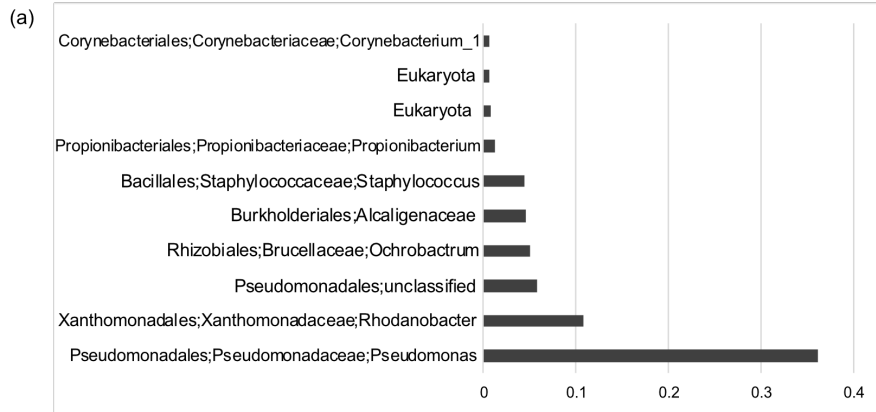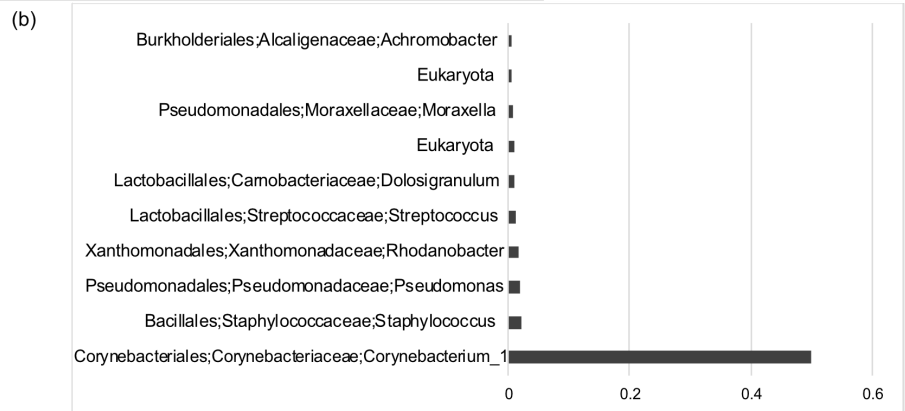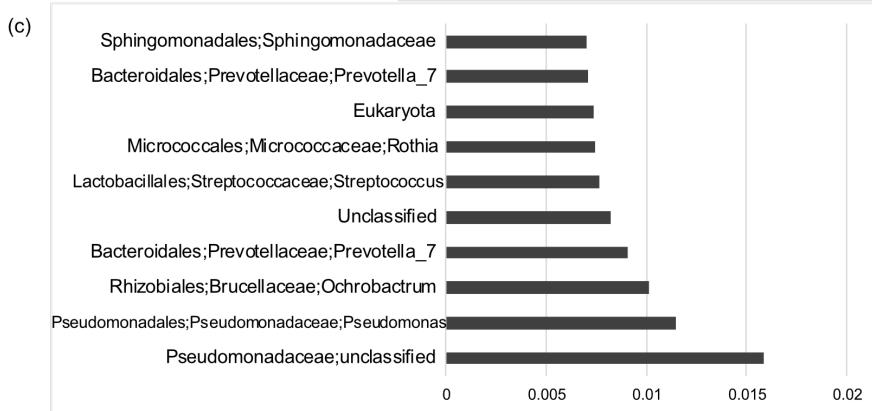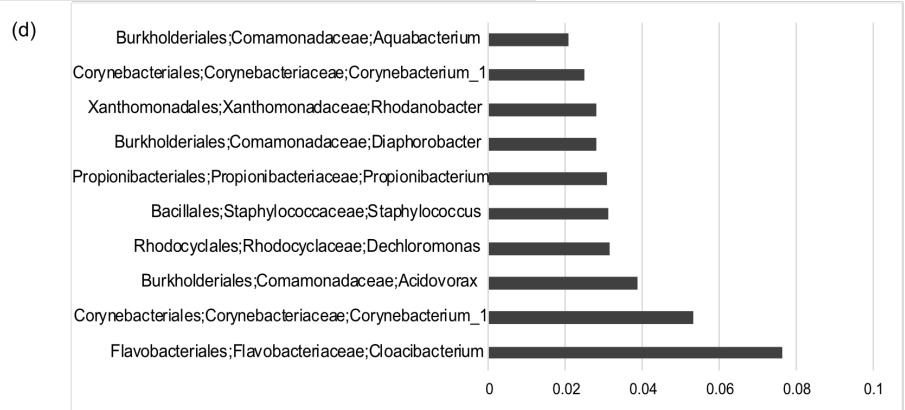

43 **Supplementary Figure 3. Relative abundance for the top ten bacterial families in the URT**  
44 **among infected and uninfected human subjects.** The relative abundance values for the most  
45 prevalent bacterial families among the three infected ecostates (a, b, and c, ) and the one  
46 uninfected (d) ecostate from human samples based on the Bayesian posterior predictive  
47 probabilities from the Infinite Dirichlet Multinomial mixture Models run over 2000 iterations  
48 (top to bottom, (a)-(d)). Source data are provided as a Source Data file.

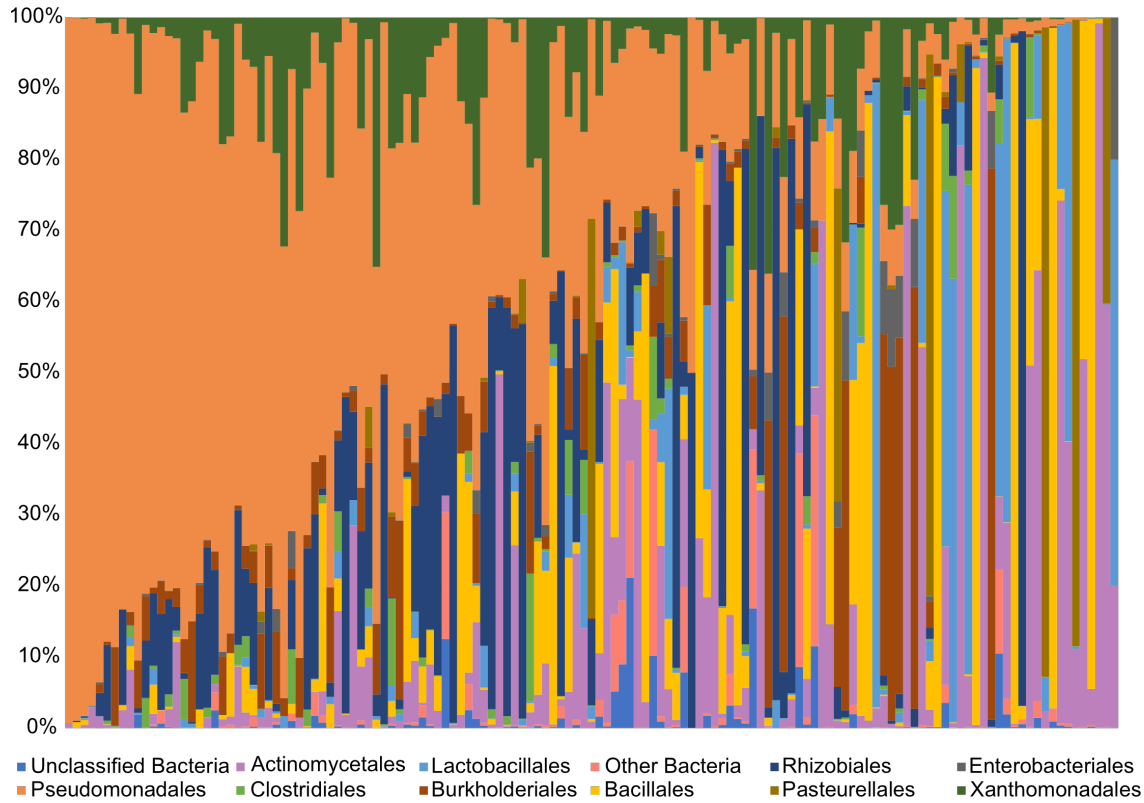

**Supplementary Figure 4. Comprehensive taxonomic breakdown for influenza-infected human subjects.** The plot summarizes the relative abundances at the order level for taxonomic groups that are present in greater than 1% of the samples. Each vertical column is an individual subject. Source data are provided as a Source Data file.

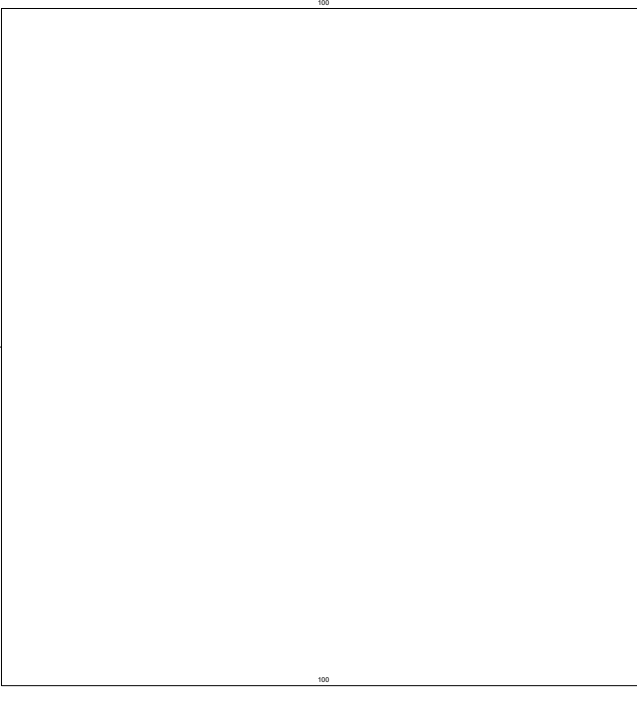

NR\_148643.1\_269-518\_Acinetobacter\_equi\_strain\_114\_16S\_ribosomal\_RNA\_partial\_sequence  
 NR\_119114.1\_249-498\_Acinetobacter\_johnsonii\_strain\_DSM\_6963\_16S\_ribosomal\_RNA\_partial\_sequence  
 NR\_117624.1\_273-522\_Acinetobacter\_johnsonii\_strain\_ATCC\_17509\_16S\_ribosomal\_RNA\_partial\_sequence  
 NR\_114072.1\_253-502\_Acinetobacter\_radiorisistens\_strain\_NBRC\_102415\_16S\_ribosomal\_RNA\_partial\_sequence  
 NR\_026210.1\_249-498\_Acinetobacter\_radiorisistens\_strain\_FC-1\_16S\_ribosomal\_RNA\_partial\_sequence  
 NR\_153741.1\_207-450\_Acinetobacter\_collicus\_strain\_ANG\_3831\_16S\_ribosomal\_RNA\_partial\_sequence  
 NR\_025425.1\_243-492\_Acinetobacter\_purvus\_strain\_LJH4416\_16S\_ribosomal\_RNA\_partial\_sequence  
 NR\_148846.1\_253-502\_Acinetobacter\_protocytlicus\_strain\_NIPH\_809\_16S\_ribosomal\_RNA\_partial\_sequence  
 NR\_148845.1\_253-502\_Acinetobacter\_moderatus\_strain\_NIPH\_236\_16S\_ribosomal\_RNA\_partial\_sequence  
 NR\_044975.1\_263-512\_Acinetobacter\_gylerbergii\_strain\_RUH\_422\_16S\_ribosomal\_RNA\_partial\_sequence  
 NR\_042026.1\_243-492\_Acinetobacter\_gylerbergii\_strain\_RUH\_422\_16S\_ribosomal\_RNA\_partial\_sequence  
 NR\_117193.1\_270-516\_Acinetobacter\_jernbergiae\_strain\_DSM\_14971\_16S\_ribosomal\_RNA\_partial\_sequence  
 NR\_148847.1\_253-502\_Acinetobacter\_johnsonii\_strain\_Mannheim\_389560\_16S\_ribosomal\_RNA\_partial\_sequence  
 NR\_148847.1\_253-502\_Acinetobacter\_johnsonii\_strain\_Mannheim\_389560\_16S\_ribosomal\_RNA\_partial\_sequence  
 NR\_157606.1\_273-522\_Acinetobacter\_collettrirensistens\_strain\_NIPH\_1859\_16S\_ribosomal\_RNA\_partial\_sequence  
 NR\_117629.1\_273-522\_Acinetobacter\_jernbergiae\_strain\_DSM\_14971\_16S\_ribosomal\_RNA\_partial\_sequence  
 Otu000004\_fenel[Pseudomonadales\_Moraxellaceae\_Acinetobacter]  
 NR\_148843.1\_253-502\_Acinetobacter\_courvalinii\_strain\_ANG\_3623\_16S\_ribosomal\_RNA\_partial\_sequence  
 NR\_117631.1\_223-472\_Acinetobacter\_nosocomialis\_strain\_RUH\_2376\_16S\_ribosomal\_RNA\_partial\_sequence  
 NR\_152004.1\_273-522\_Acinetobacter\_lactucae\_strain\_NRRL\_B-41902\_16S\_ribosomal\_RNA\_partial\_sequence  
 NR\_042387.1\_264-513\_Acinetobacter\_calcoaceticus\_strain\_NCCB\_22016\_16S\_ribosomal\_RNA\_partial\_sequence  
 NR\_116174.1\_274-523\_Acinetobacter\_pitti\_DSM\_21653\_strain\_CIP\_70\_29\_16S\_ribosomal\_RNA\_partial\_sequence  
 NR\_117621.1\_273-522\_Acinetobacter\_pitti\_DSM\_21653\_strain\_ATCC\_19004\_16S\_ribosomal\_RNA\_partial\_sequence  
 NR\_117930.1\_225-474\_Acinetobacter\_pitti\_strain\_LMG\_1035\_16S\_ribosomal\_RNA\_partial\_sequence  
 NR\_020207.1\_249-498\_Acinetobacter\_haemolyticus\_strain\_DSM\_6962\_16S\_ribosomal\_RNA\_partial\_sequence  
 NR\_117622.1\_273-522\_Acinetobacter\_haemolyticus\_strain\_ATCC\_17906\_16S\_ribosomal\_RNA\_partial\_sequence  
 NR\_119359.1\_263-512\_Acinetobacter\_haemolyticus\_strain\_ATCC\_17906\_16S\_ribosomal\_RNA\_partial\_sequence  
 NR\_114216.1\_237-486\_Pseudomonas\_mandelii\_strain\_NBRC\_103147\_16S\_ribosomal\_RNA\_partial\_sequence  
 NR\_029042.2\_255-504\_Pseudomonas\_lini\_strain\_DLE411J\_16S\_ribosomal\_RNA\_partial\_sequence  
 NR\_074997.1\_250-499\_Pseudomonas\_syringae\_strain\_DC3000\_16S\_ribosomal\_RNA\_partial\_sequence  
 NR\_156815.1\_264-513\_Pseudomonas\_slesensis\_strain\_A3\_16S\_ribosomal\_RNA\_complete\_sequence  
 NR\_132724.1\_192-441\_Pseudomonas\_proseki\_strain\_AN281\_16S\_ribosomal\_RNA\_partial\_sequence  
 NR\_112075.1\_235-484\_Pseudomonas\_venoni\_strain\_CIP\_104663\_16S\_ribosomal\_RNA\_partial\_sequence  
 NR\_025567.1\_243-492\_Pseudomonas\_meridiana\_strain\_CMS\_38\_16S\_ribosomal\_RNA\_partial\_sequence  
 NR\_025586.1\_243-492\_Pseudomonas\_antarctica\_strain\_CMS\_35\_16S\_ribosomal\_RNA\_partial\_sequence  
 NR\_043716.1\_205-454\_Pseudomonas\_syringae\_strain\_NCPP19\_281\_16S\_ribosomal\_RNA\_partial\_sequence  
 NR\_024707.1\_237-486\_Pseudomonas\_savastanoi\_strain\_ATCC\_13522\_16S\_ribosomal\_RNA\_partial\_sequence  
 NR\_025174.1\_243-492\_Pseudomonas\_extremorientalis\_strain\_KMM\_3447\_16S\_ribosomal\_RNA\_partial\_sequence  
 NR\_114911.1\_258-507\_Pseudomonas\_extremorientalis\_14-3\_16S\_ribosomal\_RNA\_partial\_sequence  
 NR\_040798.1\_243-492\_Pseudomonas\_fusciretractae\_strain\_JCM\_2400\_16S\_ribosomal\_RNA\_partial\_sequence  
 NR\_028986.1\_235-484\_Pseudomonas\_poaie\_strain\_P\_52713\_16S\_ribosomal\_RNA\_partial\_sequence  
 NR\_117620.1\_209-456\_Pseudomonas\_syringae\_strain\_CIP\_3023\_16S\_ribosomal\_RNA\_partial\_sequence  
 NR\_028706.1\_266-505\_Pseudomonas\_venoni\_strain\_CIP\_104663\_16S\_ribosomal\_RNA\_partial\_sequence  
 NR\_025549.1\_237-486\_Pseudomonas\_tremae\_strain\_TO1\_16S\_ribosomal\_RNA\_partial\_sequence  
 NR\_148827.1\_208-457\_Pseudomonas\_cerasi\_strain\_58\_16S\_ribosomal\_RNA\_partial\_sequence  
 NR\_028887.1\_235-484\_Pseudomonas\_trivialis\_strain\_P\_51319\_16S\_ribosomal\_RNA\_partial\_sequence  
 NR\_042392.1\_185-434\_Pseudomonas\_simiae\_strain\_OLI\_16S\_ribosomal\_RNA\_partial\_sequence  
 NR\_117621.1\_207-456\_Pseudomonas\_simiae\_strain\_LMG\_2633\_16S\_ribosomal\_RNA\_partial\_sequence  
 NR\_114749.1\_265-504\_Pseudomonas\_protegens\_strain\_CHAO\_16S\_ribosomal\_RNA\_partial\_sequence  
 NR\_117622.1\_209-456\_Pseudomonas\_savastanoi\_strain\_CFBP\_1670\_16S\_ribosomal\_RNA\_partial\_sequence  
 NR\_028985.1\_237-486\_Pseudomonas\_congolesis\_strain\_P\_53823\_16S\_ribosomal\_RNA\_partial\_sequence  
 Otu000003\_humani[Pseudomonadales\_Pseudomonadaceae\_Pseudomonas]  
 Otu000002\_humani[Pseudomonadales\_Pseudomonadaceae\_Pseudomonas]  
 NR\_113646.1\_235-484\_Pseudomonas\_alkaligenes\_strain\_NBRC\_14159\_16S\_ribosomal\_RNA\_partial\_sequence  
 NR\_121733.1\_255-504\_Pseudomonas\_knackmussii\_B13\_16S\_ribosomal\_RNA\_partial\_sequence  
 NR\_114194.1\_235-484\_Pseudomonas\_citronellolis\_strain\_NBRC\_103043\_16S\_ribosomal\_RNA\_partial\_sequence  
 NR\_114472.1\_244-493\_Pseudomonas\_alkaligenes\_strain\_ATCC\_14909\_16S\_ribosomal\_RNA\_partial\_sequence  
 NR\_112069.1\_231-480\_Pseudomonas\_citronellolis\_strain\_ATCC\_13674\_16S\_ribosomal\_RNA\_partial\_sequence  
 NR\_117627.1\_207-456\_Pseudomonas\_alkaligenes\_16S\_ribosomal\_RNA\_partial\_sequence  
 NR\_026533.1\_235-484\_Pseudomonas\_citronellolis\_strain\_DSM\_50332\_16S\_ribosomal\_RNA\_partial\_sequence  
 NR\_043731.1\_257-506\_Pseudomonas\_delihiensis\_strain\_RLD-1\_16S\_ribosomal\_RNA\_partial\_sequence  
 NR\_041702.1\_271-519\_Pseudomonas\_knackmussii\_B13\_16S\_ribosomal\_RNA\_partial\_sequence  
 NR\_117678.1\_255-502\_Pseudomonas\_aeruginosa\_strain\_DSM\_50071\_16S\_ribosomal\_RNA\_partial\_sequence  
 NR\_042435.1\_251-498\_Pseudomonas\_nitroreducens\_strain\_IAM\_1439\_16S\_ribosomal\_RNA\_partial\_sequence  
 NR\_119225.1\_237-484\_Pseudomonas\_multiresistivans\_strain\_ATCC\_70690\_16S\_ribosomal\_RNA\_partial\_sequence  
 NR\_114471.1\_256-503\_Pseudomonas\_aeruginosa\_strain\_ATCC\_10145\_16S\_ribosomal\_RNA\_partial\_sequence  
 NR\_114975.1\_251-498\_Pseudomonas\_nitroreducens\_strain\_DSM\_14399\_16S\_ribosomal\_RNA\_partial\_sequence  
 NR\_119301.1\_237-484\_Pseudomonas\_nitroreducens\_strain\_NBRC\_12934\_16S\_ribosomal\_RNA\_partial\_sequence  
 NR\_113599.1\_237-484\_Pseudomonas\_aeruginosa\_strain\_NBRC\_12689\_16S\_ribosomal\_RNA\_partial\_sequence  
 NR\_114957.1\_199-447\_Pseudomonas\_guezzami\_strain\_RAZ6\_16S\_ribosomal\_RNA\_partial\_sequence  
 NR\_045289.1\_266-507\_Pseudomonas\_olida\_strain\_MCC-10330\_16S\_ribosomal\_RNA\_partial\_sequence  
 NR\_041715.1\_243-492\_Pseudomonas\_stutzeri\_ATCC\_17588 = LMG\_11199\_16S\_ribosomal\_RNA\_partial\_sequence  
 NR\_116489.1\_249-498\_Pseudomonas\_stutzeri\_strain\_VKM\_B-975\_16S\_ribosomal\_RNA\_partial\_sequence  
 NR\_159319.1\_242-491\_Pseudomonas\_fuvalis\_strain\_ASS-1\_16S\_ribosomal\_RNA\_partial\_sequence  
 NR\_103934.2\_262-511\_Pseudomonas\_stutzeri\_ATCC\_17588 = LMG\_11199\_16S\_ribosomal\_RNA\_complete\_sequence  
 NR\_113852.1\_235-484\_Pseudomonas\_stutzeri\_strain\_NBRC\_14165\_16S\_ribosomal\_RNA\_partial\_sequence  
 NR\_114751.1\_249-498\_Pseudomonas\_stutzeri\_strain\_DSM\_5190\_16S\_ribosomal\_RNA\_partial\_sequence  
 NR\_114751.1\_232-481\_Pseudomonas\_stutzeri\_strain\_CJCG\_11256\_16S\_ribosomal\_RNA\_partial\_sequence  
 NR\_024899.1\_249-497\_Pseudomonas\_orientalis\_strain\_CFM\_36-170\_16S\_ribosomal\_RNA\_partial\_sequence  
 EF05454\_S000752001\_Root\_Archaea\_Euryarchaeota\_Halobacteria\_Halobacteriales\_Halobacteriaceae\_Halosarcina  
 EF028067\_S000842633\_Root\_Archaea\_Euryarchaeota\_Halobacteria\_Halobacteriales\_Halobacteriaceae\_Halorubrum  
 EF077631\_S000769044\_Root\_Archaea\_Euryarchaeota\_Halobacteria\_Halobacteriales\_Halobacteriaceae\_Natronococcus  
 EF077633\_S000769048\_Root\_Archaea\_Euryarchaeota\_Halobacteria\_Halobacteriales\_Halobacteriaceae\_Haloterrigena  
 EF016295\_S000824488\_Root\_Archaea\_Euryarchaeota\_Methanobacteria\_Methanobacteriales\_Methanobacteriaceae\_Methanobacterium

54

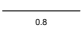

55

**Supplementary Figure 5: Phylogenetic inference of the diagnostic *Pseudomonadales* OTUs**

56

**relative to reference sequences from cultivated strains. Source data are provided as a Source**

57

**Data file.**



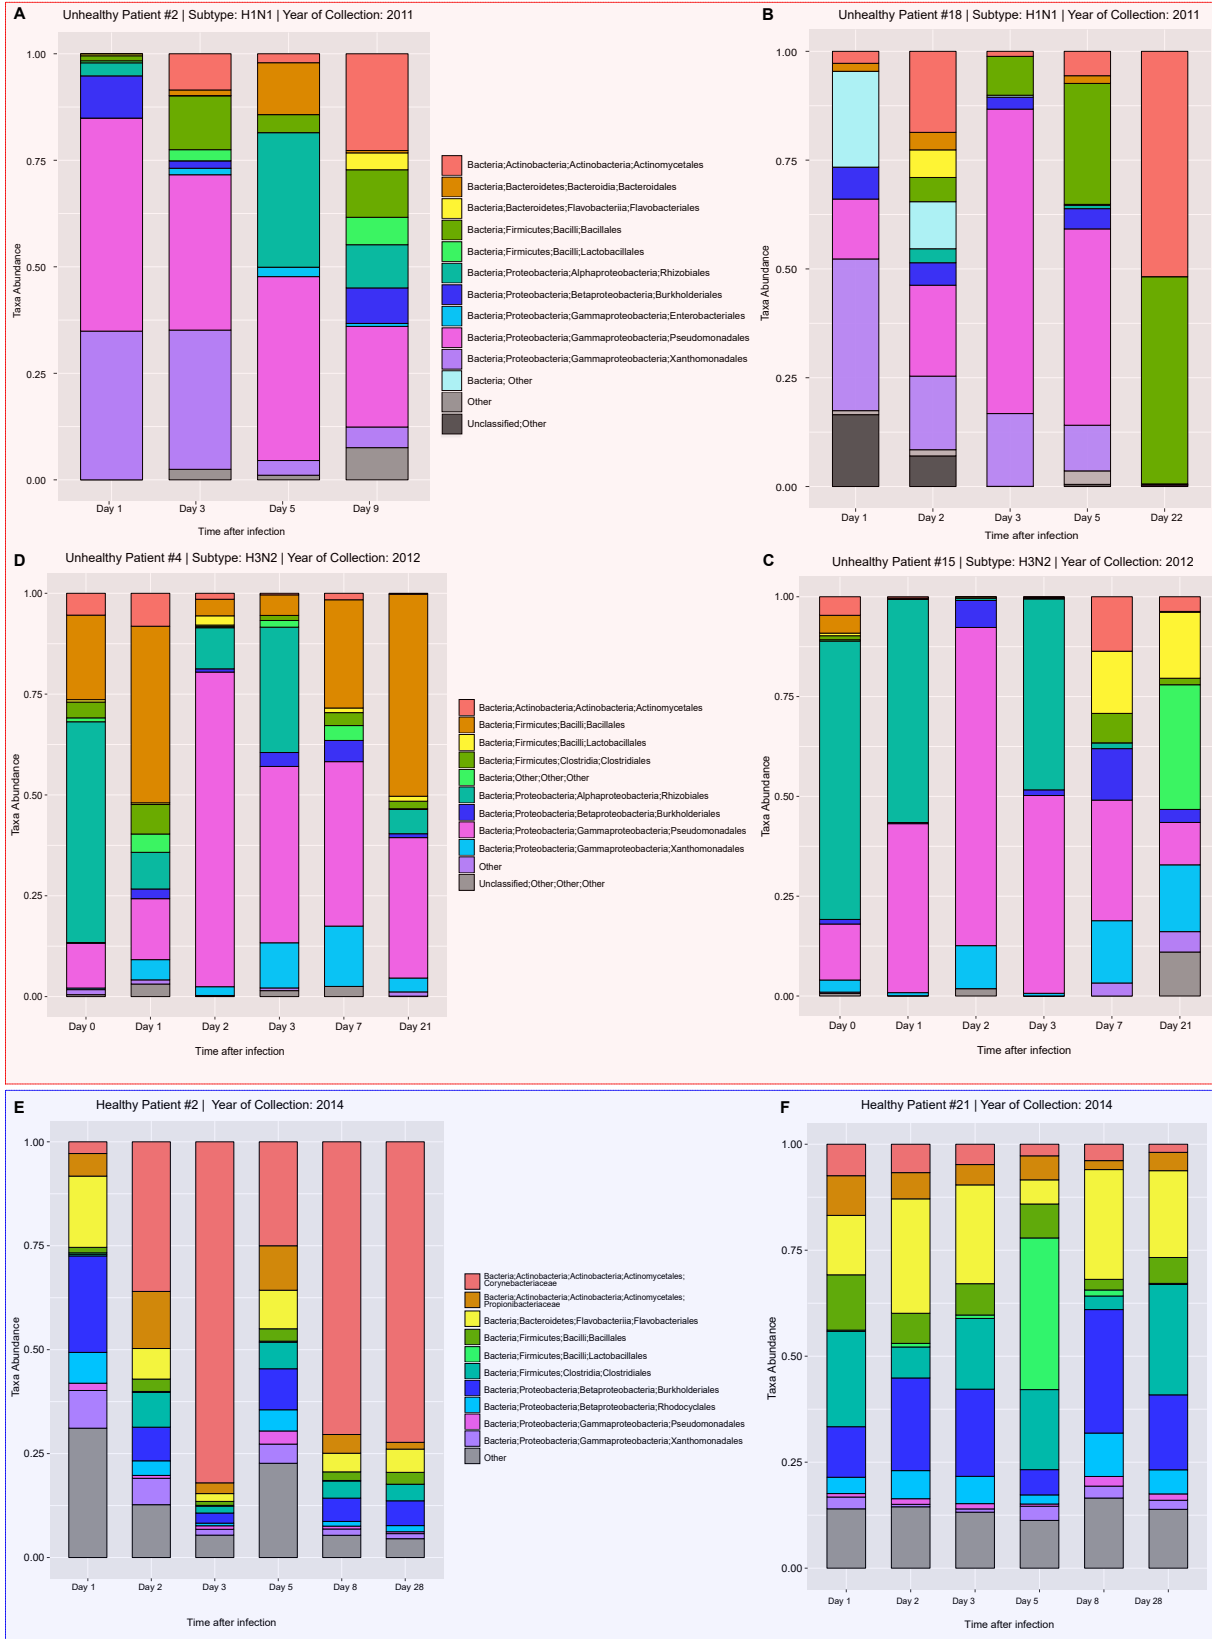

59 **Supplementary Figure 6. Comprehensive temporal taxonomic breakdown for human**  
60 **subjects.** The plot summarizes the relative taxonomic abundances at the order level across all  
61 timepoints for taxonomic groups that are present in greater than 1% of the four influenza infected  
62 subjects (2 for each virus subtype, A-D clockwise) and 2 healthy subjects (E-F).  
63 Pseudomonadales (pink) is prevalent among the infected individuals (to 4), whereas inconsistent  
64 taxa are seen among the healthy control individuals (bottom 2). Source data are provided as a  
65 Source Data file.

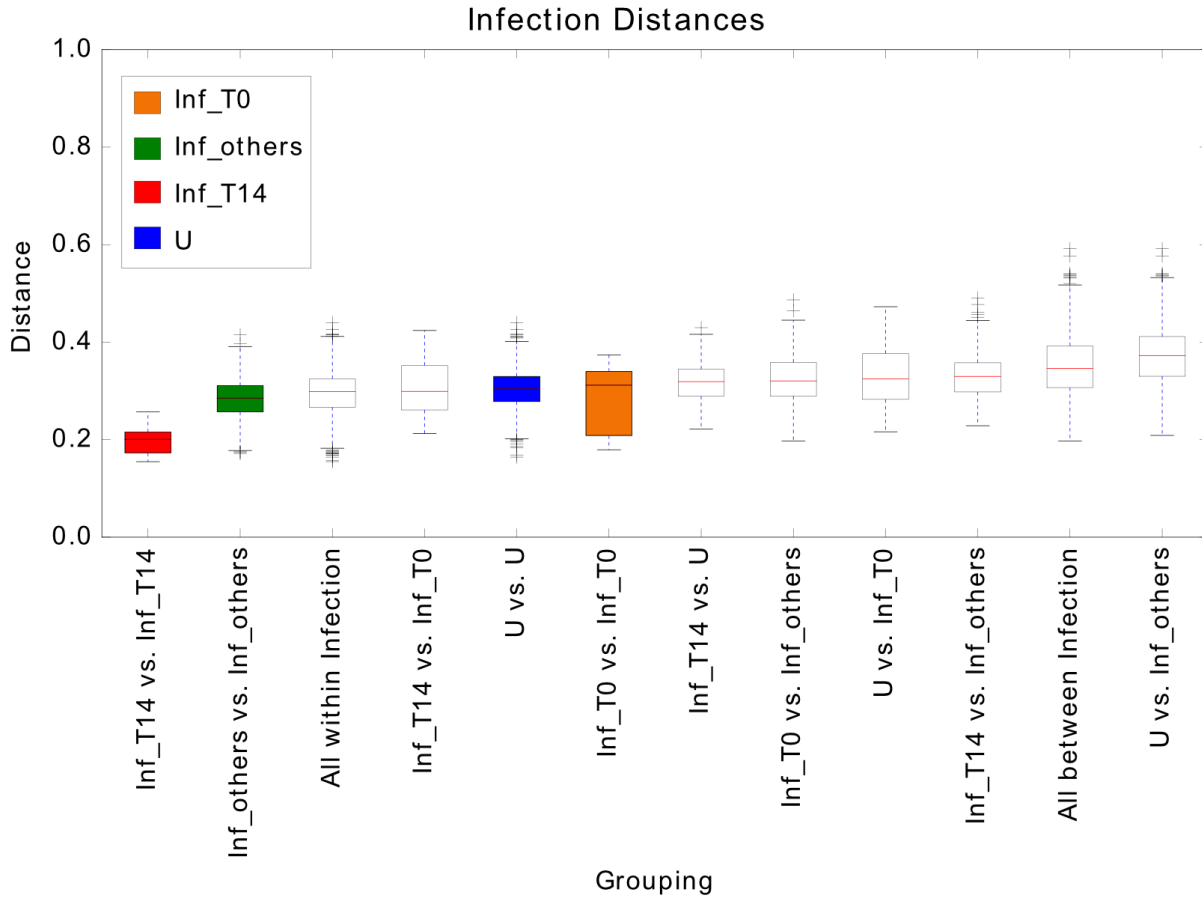

66

67 **Supplementary Figure 7. Diversity distance analyses of the microbiome of infected and**  
 68 **uninfected ferrets.** Box and whisker plots for beta diversity distances within and between  
 69 influenza types for samples obtained for groups of 7 Infected (grouped by time points as Inf\_T0,  
 70 Inf\_others and Inf\_T14) and 7 Uninfected (U) ferrets. The boxplots, sorted by median, represent  
 71 the diversity between and within the different infection types; boxplots identifying individual  
 72 time point-specific within diversity have been colored. Diversity within infected ferrets from  
 73 T=14 (red) being the least, and diversity between all uninfected (U) and infected ferrets from the  
 74 acute viral timepoints (T=1,3,5,7 dpi) being the highest, followed closely by diversity between  
 75 all infection states (all Infected vs all Uninfected) being the second highest. All the distances  
 76 were calculated using the Bray-Curtis metric. The box represents the interquartile range, the

77 horizontal line in the box indicates median for each of the sample groupings and the error bars  
78 represent standard deviation. Dotted whiskers outside the box extend from the highest to the  
79 lowest observation represented in the plot. Source data are provided as a Source Data file.

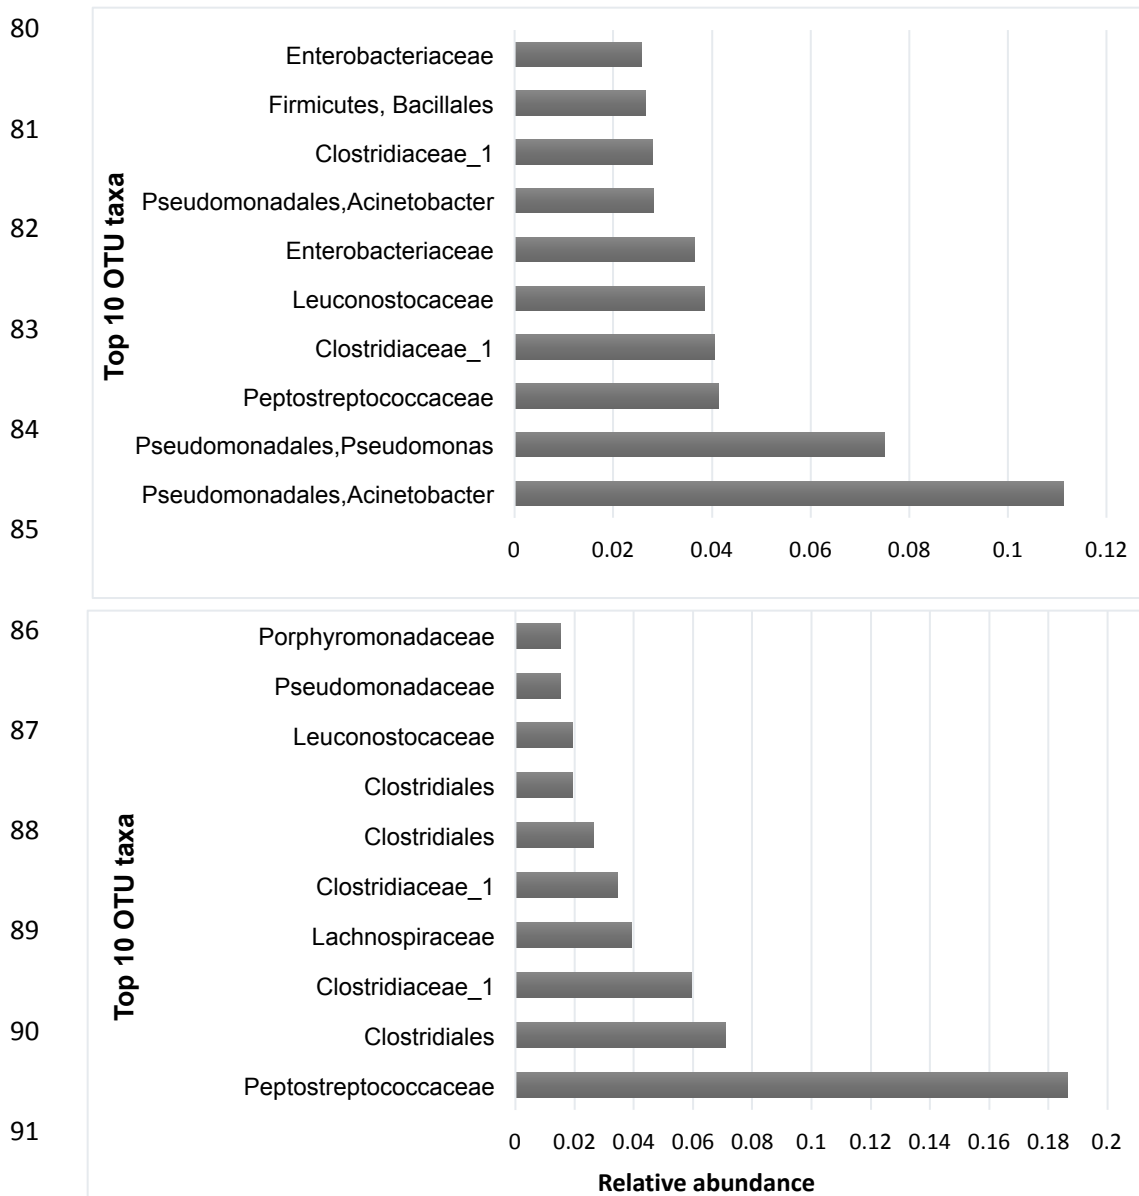

92 **Supplementary Figure 8. Relative abundance for the top ten most prevalent bacterial**  
 93 **families in the URT among infected and uninfected ferrets.** The relative abundance was  
 94 determined based on the Bayesian posterior predictive probabilities from the Infinite Dirichlet  
 95 multinomial mixture models run over 1000 iterations. Analysis were performed on  
 96 pyrosequencing data obtained for the V1-V3 region of the 16S rRNA of nasal wash samples  
 97 obtained from 7 ferrets infected (top) with the A/Netherlands/602/2009 H1N1 virus and from

- 98 uninfected ferrets (bottom) at the time points indicated on Fig. 4. Source data are provided as a
- 99 Source Data file.

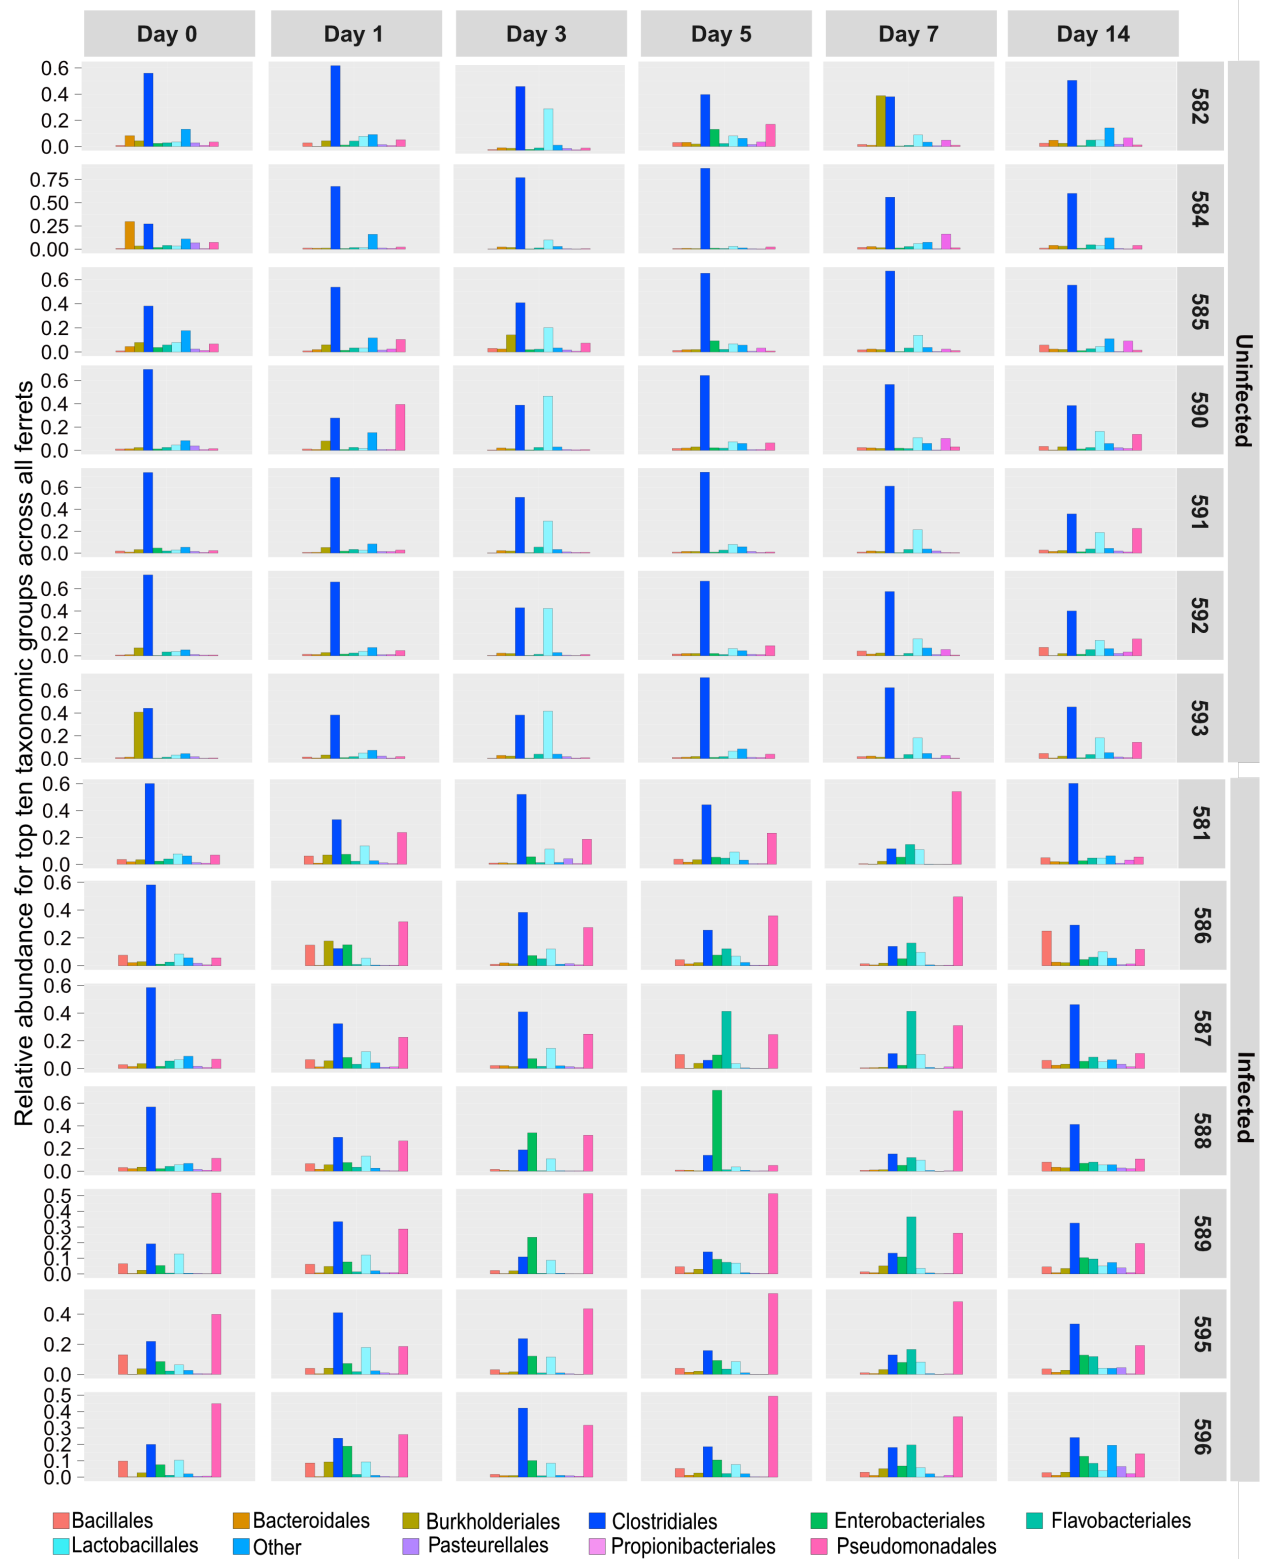

101 **Supplementary Figure 9. Comprehensive taxonomic breakdown for all 14 ferrets.** The plot  
102 summarizes the relative taxonomic abundances at the order level across all timepoints for  
103 taxonomic groups that are present in greater than 5% of the samples (see legend below).  
104 *Pseudomonadales* (pink) is prevalent among the infected ferrets (bottom 7), whereas  
105 Clostridiales (dark blue) is the most abundant among uninfected ferrets (top 7). Source data are  
106 provided as a Source Data file.



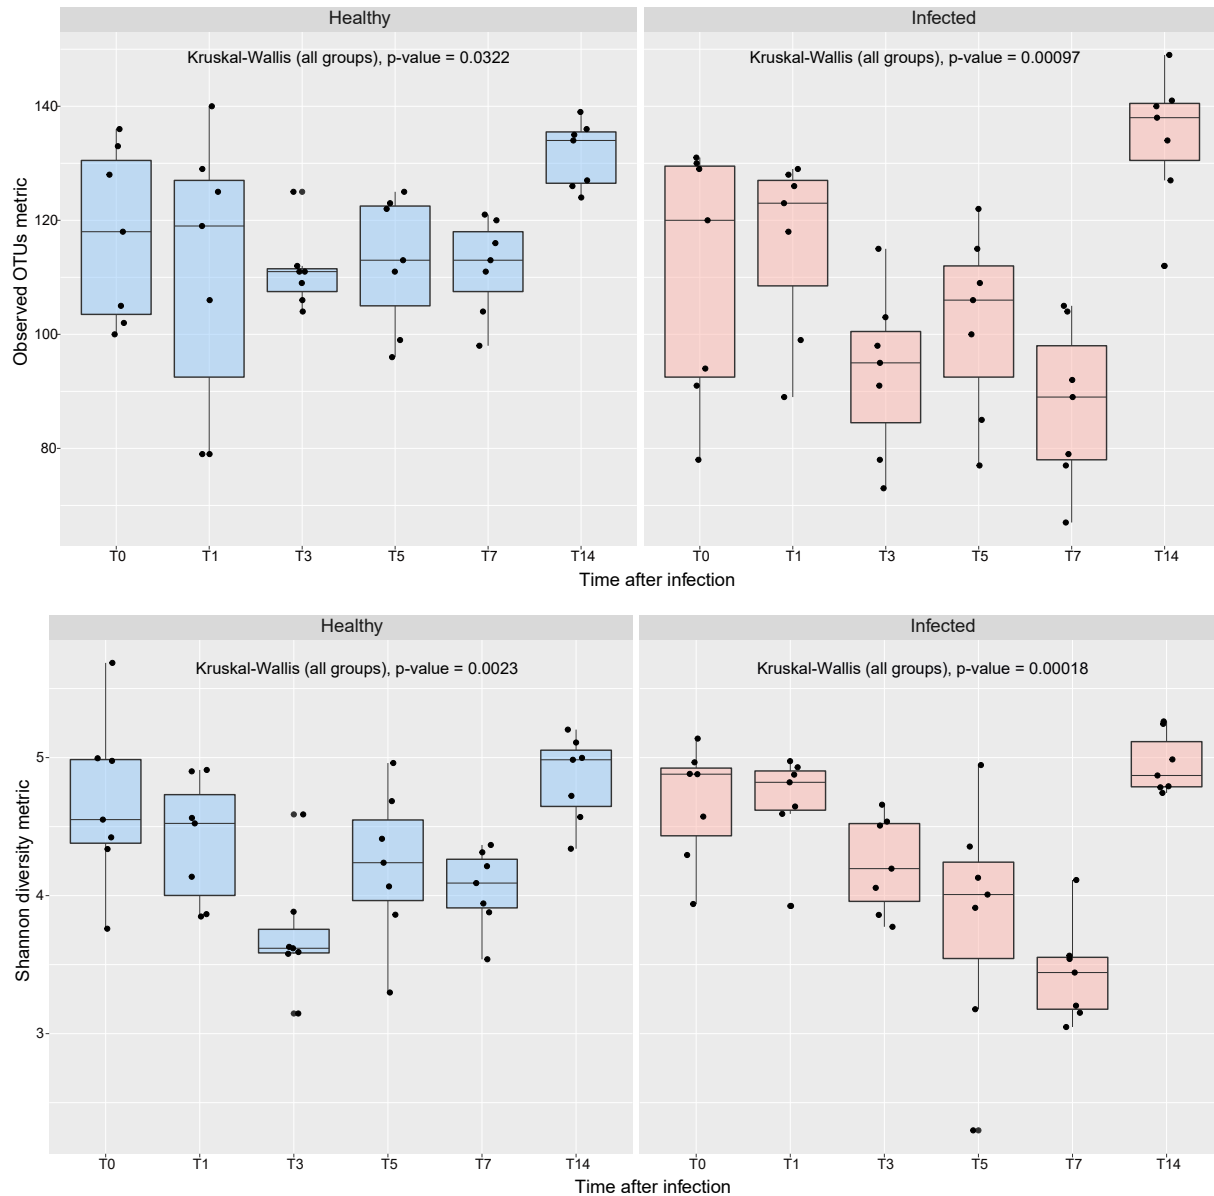

107

108 **Supplementary Figure 10. Temporal diversity distance analyses of the microbiome of**  
 109 **infected and uninfected ferrets.** Changes in alpha diversity within the uninfected ferrets (n=7,  
 110 blue) and infected ferrets (n=7, red) during IAV infection. A decrease in alpha diversity was  
 111 observed among the infected animals during the acute phase of viral infection (3 to 7 dpi), with  
 112 an eventual recovery. This was in agreement with the *Pseudomonas* bloom observed and the  
 113 peak IAV titers collected from the same time points. The boxplots represent the diversity  
 114 between the different time points. Alpha diversity was calculated using the observed OTUs

115 metric (A) and shannon diversity index (B). Statistical analysis and significance testing was  
116 done using the one-way Kruskal-Wallis method (significance level of 0.05). The box represents  
117 the interquartile range, the horizontal line within the box indicates the median for each sample  
118 grouping, observations are indicated by dots, and the whiskers outside the box extend from the  
119 highest to the lowest observation represented in the plot. Source data are provided as a Source  
120 Data file.

121 **Supplementary Table 1. Clinical-epidemiological characteristics of the hospitalized human**  
 122 **patients diagnosed with Influenza A-like illness, and healthy controls.**

| Characteristic                                       | Hospitalized patients |                      |                      | Healthy controls (n=22)* |
|------------------------------------------------------|-----------------------|----------------------|----------------------|--------------------------|
|                                                      | Total (n=28)          | H1N1 positive (n=13) | H3N2 positive (n=15) |                          |
| <b>Age</b>                                           |                       |                      |                      |                          |
| < 2 years                                            | 2                     | 1                    | 1                    | 0                        |
| 2 - 65 years                                         | 17                    | 9                    | 8                    | 22                       |
| > 65 years                                           | 9                     | 3                    | 6                    | 0                        |
| <b>Gender</b>                                        |                       |                      |                      |                          |
| Male                                                 | 13                    | 7                    | 6                    | 10                       |
| Female                                               | 15                    | 6                    | 9                    | 12                       |
| <b>Clinical severity factors</b>                     |                       |                      |                      |                          |
| Hospitalized by Influenza                            | 23                    | 8                    | 13                   | N/A                      |
| CCU by Influenza                                     | 11                    | 5                    | 6                    | N/A                      |
| O2 supply                                            | 20                    | 8                    | 10                   | N/A                      |
| MV supply                                            | 7                     | 5                    | 1                    | N/A                      |
| VAD supply                                           | 5                     | 4                    | 1                    | N/A                      |
| <b>Vaccination and Treatments</b>                    |                       |                      |                      |                          |
| Influenza Vaccine                                    | 6                     | 2                    | 4                    | 5                        |
| Antibiotics                                          | 27                    | 12                   | 13                   | N/A                      |
| Antiviral                                            | 29                    | 12                   | 15                   | N/A                      |
| <b>Comorbidities</b>                                 |                       |                      |                      |                          |
| Asthma                                               | 2                     | 0                    | 2                    | N/A                      |
| COPD/Respiratory pediatric disease                   | 3                     | 2                    | 1                    | N/A                      |
| Diabetes                                             | 8                     | 3                    | 4                    | N/A                      |
| Obesity                                              | 7                     | 3                    | 4                    | N/A                      |
| Cancer                                               | 4                     | 3                    | 1                    | N/A                      |
| Cronical cardiovascular disease                      | 12                    | 5                    | 6                    | N/A                      |
| Cronical renal disease                               | 2                     | 2                    | 0                    | N/A                      |
| Neurological disorder                                | 5                     | 2                    | 3                    | N/A                      |
| Severe immunological compromise                      | 9                     | 5                    | 4                    | N/A                      |
| <b>Symptoms</b>                                      |                       |                      |                      |                          |
| Fever                                                | 24                    | 12                   | 10                   | N/A                      |
| Runny nose                                           | 20                    | 9                    | 10                   | N/A                      |
| Throat pain                                          | 4                     | 1                    | 3                    | N/A                      |
| Expectoration                                        | 22                    | 11                   | 10                   | N/A                      |
| Myalgia                                              | 16                    | 8                    | 8                    | N/A                      |
| Conjunctivitis                                       | 5                     | 5                    | 0                    | N/A                      |
| <b>Nasopharyngeal samples sequenced <sup>a</sup></b> |                       |                      |                      |                          |
| 2 days                                               | 3                     | 1                    | 0                    | 0                        |
| 3 days                                               | 4                     | 3                    | 0                    | 0                        |
| 4 days                                               | 6                     | 5                    | 0                    | 1                        |
| 5 days                                               | 12                    | 4                    | 8                    | 1                        |
| 6 days                                               | 5                     | 0                    | 5                    | 20                       |
| 7 days                                               | 3                     | 0                    | 2                    | 0                        |
| 22 days                                              | 18                    | 1                    | 15                   | 22                       |

CCU: Clinical Care Unit, MV: Mechanical ventilation, VAD: Vasoactive drugs, COPD: Chronic obstructive pulmonary disease. N/A: Not applicable. <sup>a</sup> Days since onset of symptoms. \* Healthy controls were obtained at the outpatient clinic. Source data are provided as a Source Data file.

123 **Supplementary Table 2. Two-sided Student's two sample t test results for human samples.**  
 124 Comparison of every pair of boxplots (Supplementary Figure 1) to determine if they are  
 125 significantly different from each other. The significance indicates that samples within the same  
 126 infection state are significantly more similar to each other than samples across or between  
 127 infection states. Source data are provided as a Source Data file.

| Group 1                       | Group 2                     | t statistic | Parametric p-value | Parametric p-value (Bonferroni-corrected) |
|-------------------------------|-----------------------------|-------------|--------------------|-------------------------------------------|
| Flu negative vs. Flu negative | All within InfectionResult  | -48.874895  | 0                  | 0                                         |
| Flu negative vs. Flu negative | P vs. P                     | -62.752559  | 0                  | 0                                         |
| Flu negative vs. Flu negative | P vs. U                     | -125.7211   | 0                  | 0                                         |
| Flu negative vs. Flu negative | U vs. U                     | -144.01251  | 0                  | 0                                         |
| Flu negative vs. Flu negative | Flu negative vs. P          | -184.67231  | 0                  | 0                                         |
| Flu negative vs. Flu negative | All between InfectionResult | -239.67117  | 0                  | 0                                         |
| Flu negative vs. Flu negative | Flu negative vs. U          | -255.04846  | 0                  | 0                                         |
| All within InfectionResult    | P vs. P                     | -20.460236  | 1.27E-91           | 3.55E-90                                  |
| All within InfectionResult    | P vs. U                     | -51.51848   | 0                  | 0                                         |
| All within InfectionResult    | U vs. U                     | -63.077323  | 0                  | 0                                         |
| All within InfectionResult    | Flu negative vs. P          | -82.583982  | 0                  | 0                                         |
| All within InfectionResult    | All between InfectionResult | -144.77785  | 0                  | 0                                         |
| All within InfectionResult    | Flu negative vs. U          | -135.79499  | 0                  | 0                                         |
| P vs. P                       | P vs. U                     | -5.3872418  | 7.56E-08           | 2.12E-06                                  |
| P vs. P                       | U vs. U                     | -10.356331  | 7.40E-25           | 2.07E-23                                  |
| P vs. P                       | Flu negative vs. P          | -19.193782  | 1.54E-79           | 4.31E-78                                  |
| P vs. P                       | All between InfectionResult | -21.916458  | 3.11E-105          | 8.71E-104                                 |
| P vs. P                       | Flu negative vs. U          | -29.715216  | 3.14E-187          | 8.80E-186                                 |
| P vs. U                       | U vs. U                     | -8.413988   | 4.74E-17           | 1.33E-15                                  |
| P vs. U                       | Flu negative vs. P          | -21.393038  | 7.71E-99           | 2.16E-97                                  |
| P vs. U                       | All between InfectionResult | -30.462617  | 8.55E-200          | 2.39E-198                                 |
| P vs. U                       | Flu negative vs. U          | -42.0745    | 0                  | 0                                         |
| U vs. U                       | Flu negative vs. P          | -12.041826  | 3.94E-33           | 1.10E-31                                  |
| U vs. U                       | All between InfectionResult | -19.628053  | 4.38E-85           | 1.23E-83                                  |
| U vs. U                       | Flu negative vs. U          | -31.556094  | 1.14E-211          | 3.20E-210                                 |
| Flu negative vs. P            | All between InfectionResult | -5.4887437  | 4.09E-08           | 1.14E-06                                  |
| Flu negative vs. P            | Flu negative vs. U          | -19.243122  | 1.34E-81           | 3.77E-80                                  |
| All between InfectionResult   | Flu negative vs. U          | -18.618746  | 6.05E-77           | 1.69E-75                                  |

128 **Supplementary Table 3. Non-parametric multivariate analysis using Anosim and Adonis**  
 129 **tests.** Examining the effect of clinical parameters (gender, age and antibiotic usage) on the  
 130 infected human URT microbiomes. Source data are provided as a Source Data file.

| Variable                             | Anosim test ( <i>permutations=999</i> ) | df<br>( <i>n-1</i> ) | Adonis test<br>( <i>permutations=999</i> )           | df<br>( <i>n-1</i> ) |
|--------------------------------------|-----------------------------------------|----------------------|------------------------------------------------------|----------------------|
| Gender<br>(n=2; M/F)                 | R statistic= 0.0101<br>p-value < 0.118  | 1                    | R <sup>2</sup> statistic= 0.009<br>p-value < 0.017   | 1                    |
| Antibiotic Usage<br>(n=2; Y/N)       | R statistic= 0.242<br>p-value < 0.001   | 1                    | R <sup>2</sup> statistic= 0.04231<br>p-value < 0.001 | 1                    |
| Age<br>(n=38)                        | R statistic=0.402<br>p-value < 0.001    | 37                   | R <sup>2</sup> statistic= 0.427<br>p-value < 0.001   | 37                   |
| Vaccination status<br>(n= 3; Y/N/NA) | R statistic=0.631<br>p-value < 0.001    | 2                    | R <sup>2</sup> statistic= 0.2456<br>p-value < 0.001  | 2                    |

131

132 **Supplementary Table 4: Random forest analysis results for the human microbiomes.** Ranks  
 133 range from the first few attributes predictive of the infection state, followed by the attributes that  
 134 are most predictive of the data (maximum accuracy displayed in bold). Source data are provided  
 135 as a Source Data file.

| Rank (1-667)      | Ranked attributes (OTUs)                                                                                | OTU taxonomy <sup>a</sup>                                                                                            | Accuracy (%) |
|-------------------|---------------------------------------------------------------------------------------------------------|----------------------------------------------------------------------------------------------------------------------|--------------|
| 1 <sup>st</sup>   | <b>Otu000002</b>                                                                                        | <i>Bacteria; Proteobacteria;<br/>Gammaproteobacteria;<br/>Pseudomonadales</i>                                        | 64.00        |
| 2 <sup>nd</sup>   | Otu000002; <b>Otu000001</b>                                                                             | <i>Bacteria; Proteobacteria;<br/>Alphaproteobacteria;<br/>Rhizobiales;<br/>Brucellaceae; Ochrobactrum</i>            | 64.00        |
| 3 <sup>rd</sup>   | Otu000002; Otu000001; <b>Otu000003</b>                                                                  | <i>Bacteria; Proteobacteria;<br/>Gammaproteobacteria;<br/>Pseudomonadales;<br/>Pseudomonadaceae;<br/>Pseudomonas</i> | 62.00        |
| 137 <sup>th</sup> | Otu000002; Otu000001; Otu000003; Otu000006;<br>Otu000055; Otu000035; Otu000005, etc (130<br>other OTUs) |                                                                                                                      | <b>71.00</b> |

136 <sup>a</sup> Taxonomy presented for most predictive OTU identified in bold

137 **Supplementary Table 5. Two-sided Student's two sample t test results for ferrets.**  
 138 Comparison of every pair of boxplots (Supplementary Figure 4). The significance indicates that  
 139 samples within the same infection state are significantly more similar to each other than samples  
 140 across or between infection states. Source data are provided as a Source Data file.

| <b>Group 1</b>            | <b>Group 2</b>         | <b>t statistic</b> | <b>Parametric p-value</b> | <b>Parametric p-value (Bonferroni-corrected)</b> |
|---------------------------|------------------------|--------------------|---------------------------|--------------------------------------------------|
| Inf_T14 vs. Inf_T14       | All within Infection   | -9.8555            | 3.79E-22                  | 2.50E-20                                         |
| Inf_T14 vs. Inf_T14       | All between Infection  | -11.5323           | 6.32E-30                  | 4.17E-28                                         |
| Inf_others vs. Inf_others | All within Infection   | -4.39922           | 1.16E-05                  | 0.000763                                         |
| Inf_others vs. Inf_others | All between Infection  | -20.6832           | 4.63E-88                  | 3.05E-86                                         |
| All within Infection      | Inf_T14 vs. Inf_T0     | -1.65626           | 0.097905                  | 1                                                |
| All within Infection      | U vs. U                | -3.93485           | 8.59E-05                  | 0.00567                                          |
| All within Infection      | Inf_T0 vs. Inf_T0      | 0.572274           | 0.567235                  | 1                                                |
| All within Infection      | Inf_T14 vs. U          | -8.18941           | 5.37E-16                  | 3.54E-14                                         |
| All within Infection      | Inf_T0 vs. Inf_others  | -7.7768            | 1.39E-14                  | 9.16E-13                                         |
| All within Infection      | U vs. Inf_T0           | -11.5317           | 1.36E-29                  | 8.99E-28                                         |
| All within Infection      | Inf_T14 vs. Inf_others | -10.7143           | 7.57E-26                  | 5.00E-24                                         |
| All within Infection      | All between Infection  | -28.681            | 1.34E-162                 | 8.85E-161                                        |
| All within Infection      | U vs. Inf_others       | -37.1721           | 2.51E-240                 | 1.66E-238                                        |
| U vs. U                   | All between Infection  | -21.4854           | 1.69E-95                  | 1.12E-93                                         |
| Inf_T0 vs. Inf_T0         | All between Infection  | -4.62237           | 4.01E-06                  | 0.000265                                         |
| All between Infection     | U vs. Inf_others       | -10.5276           | 1.59E-25                  | 1.05E-23                                         |

141

142 **Supplementary Table 6. Random forest analysis results for the ferret microbiomes.** Ranks  
 143 range from the first few attributes predictive of the infection state, followed by the attributes that  
 144 are most predictive of the data (maximum accuracy displayed in bold). Source data are provided  
 145 as a Source Data file.

| Rank<br>(1-259) | Ranked attributes (OTUs)                                                       | OTU taxonomy <sup>a</sup>                                                                                           | Accuracy<br>(%) |
|-----------------|--------------------------------------------------------------------------------|---------------------------------------------------------------------------------------------------------------------|-----------------|
| 1 <sup>st</sup> | <b>Otu000004</b>                                                               | <i>Bacteria;Proteobacteria;<br/>Gammaproteobacteria;<br/>Pseudomonadales;<br/>Moraxellaceae;Acinetobacter</i>       | 79.79           |
| 2 <sup>nd</sup> | Otu000004; <b>Otu000028</b>                                                    | <i>Bacteria;Proteobacteria;<br/>Gammaproteobacteria;<br/>Enterobacteriales;<br/>Enterobacteriaceae;Enterobacter</i> | 91.69           |
| 3 <sup>rd</sup> | Otu000004; Otu000028; <b>Otu000017</b>                                         | <i>Bacteria;Firmicutes;<br/>Bacilli;Bacillales;<br/>Family_XII;Exiguobacterium</i>                                  | 89.26           |
| 7 <sup>th</sup> | Otu000004; Otu000028; Otu000017; Otu000001;<br>Otu000027; Otu000170; Otu000008 |                                                                                                                     | <b>96.47</b>    |

146 <sup>a</sup> Taxonomy presented for most predictive OTU identified in bold
